# Supplementary material
Source: PubMed Central journal article supplement (PMC1904133)
Supplement: pnas_0700577104_3.pdf [file pnas_0700577104_3.pdf]

### Action potential

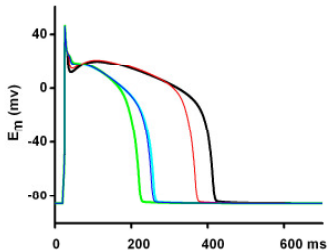

### Ca<sup>2+</sup> currents

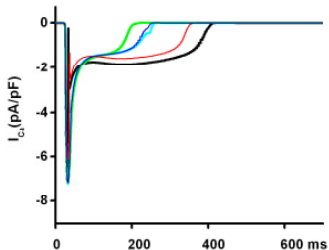

### Ca<sup>2+</sup> transients

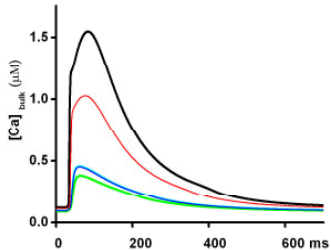

control

activation

inactivation

voltage shift

combined  $\alpha_2\delta-1$  siRNA effects
