# Supplementary material
Source: PubMed Central journal article supplement (PMC1904133)

**A**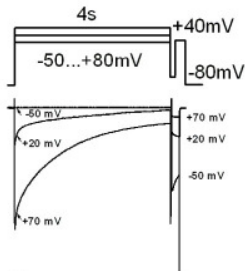**B**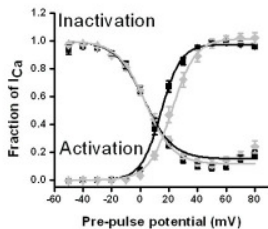**C**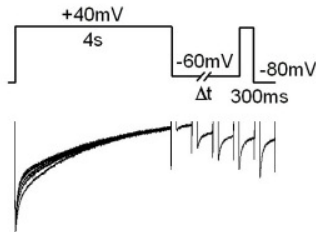**D**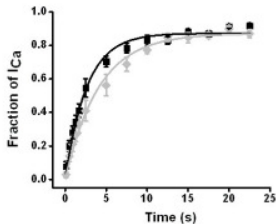

■ GFP- $\alpha_{1C}$  + control siRNA

◆ GFP- $\alpha_{1C}$  +  $\alpha_2\delta$ -1 siRNA

Supplement: pnas_0700577104_1.pdf [file pnas_0700577104_1.pdf]

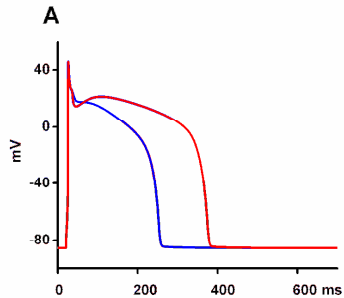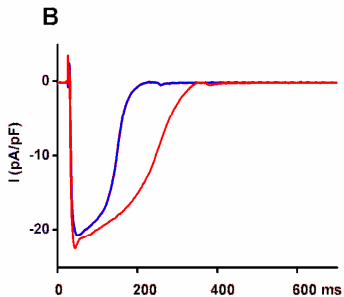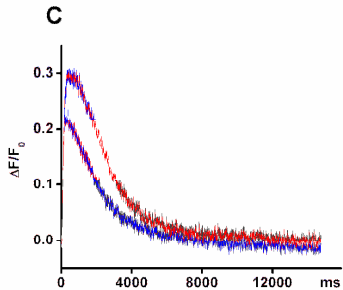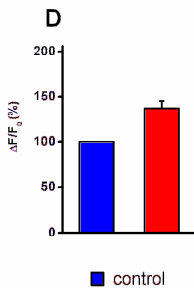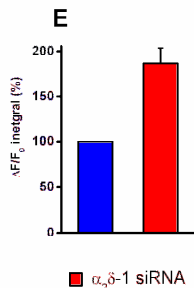

Supplement: pnas_0700577104_2.pdf [file pnas_0700577104_2.pdf]
